# Supplementary material for: Clinical validation of the tempus xT next-generation targeted oncology sequencing assay
Source: PubMed Central journal article supplement (PMC6481324; doi:10.18632/oncotarget.26797), 2019-03-22
Supplement: oncotarget-10-2384-s001.pdf [file oncotarget-10-2384-s001.pdf]

## Clinical validation of the tempus xT next-generation targeted oncology sequencing assay

### SUPPLEMENTARY MATERIALS

Supplementary Table 1: Class I HLA typing accuracy

| Gene        | Two-digit accuracy | Four-digit accuracy | Zygoty accuracy |
|-------------|--------------------|---------------------|-----------------|
| HLA-A       | 99.29%             | 94.29%              | 97.14%          |
| HLA-B       | 100.00%            | 97.14%              | 97.14%          |
| HLA-C       | 100.00%            | 96.43%              | 97.14%          |
| All Class I | 99.76%             | 96.61%              | 97.14%          |

Accuracy of *in silico* predicted HLA types determined for 72 reference samples acquired directly from the International Histocompatibility Working Group. Accuracy is calculated as the percentage of correctly identified alleles. Zygoty was calculated as an independent metric measuring whether heterozygoty or homozygoty was correctly predicted.

Supplementary Table 2: Class I HLA alleles associated with clinical trial criteria

| Use                           | Allele        | Relevant clinical trials (NCTID)                                                                                | Present | Detected | False positive |
|-------------------------------|---------------|-----------------------------------------------------------------------------------------------------------------|---------|----------|----------------|
|                               | A*01 (family) | NCT02153905                                                                                                     | 13      | 13       | 0              |
|                               | A*02 (family) | NCT03132922, NCT00194714,<br>NCT00060528, NCT01876212,<br>NCT02869217                                           | 27      | 27       | 0              |
| <b>Inclusion<br/>Criteria</b> | A*02:01       | NCT02869217, NCT02408016,<br>NCT03247309, NCT02989064,<br>NCT03132792, NCT03326921,<br>NCT00509288, NCT02858310 | 14      | 14       | 2*             |
|                               | A*02:06       | NCT02869217, NCT02989064                                                                                        | 2       | 2        | 0              |
|                               | A*11:01       | NCT03190941                                                                                                     | 7       | 6**      | 0              |
|                               | C*08:02       | NCT01174121                                                                                                     | 5       | 5        | 0              |
|                               | A*02:02       | NCT03132792                                                                                                     | 1       | 1        | 0              |
|                               | A*02:05       | NCT02153905, NCT02989064                                                                                        | 1       | 1        | 0              |
| <b>Exclusion<br/>Criteria</b> | A*02:07       | NCT02153905                                                                                                     | 1       | 1        | 0              |
|                               | B*15:01       | NCT02989064                                                                                                     | 6       | 6        | 0              |
|                               | B*46:01       | NCT02989064                                                                                                     | 4       | 4        | 0              |
|                               | B*51:03       | NCT03132792                                                                                                     | 1       | 1        | 0              |
|                               | C*04:04       | NCT03132792                                                                                                     | 0       | 0        | 0              |

HLA prediction accuracy on specific alleles that are mentioned as inclusion or exclusion criteria in clinical trials listed on ClinicalTrials.gov. For reference samples known to carry these alleles, we assessed how frequently HLA prediction also identified these alleles as well as the rate of false positive calls.

\*Both false positives are rare null alleles, one of which is identical across the exons assayed and the other differs by only 1 nucleotide.

\*\*Illumina in their validation of TruSight HLA v2 and HLAassign both had difficulty detecting the presence of A\*11:01 in this sample and were unable to confirm A\*11 in the missed call by close inspection of HLA reads or Luminex Assay.

**Supplementary Table 3: Class I HLA alleles associated with pharmacological adverse events**

| <b>Allele</b>  | <b>Drug interaction</b>                                                          | <b>Present</b> | <b>Detected</b> | <b>False positive</b> |
|----------------|----------------------------------------------------------------------------------|----------------|-----------------|-----------------------|
| <b>A*31:01</b> | Carbamazepine <sup>1</sup>                                                       | 2              | 2               | 0                     |
| <b>B*15:02</b> | Carbamazepine <sup>1</sup> , Oxcarbazepine <sup>2</sup> , Phenytoin <sup>3</sup> | 1              | 1               | 0                     |
| <b>B*57:01</b> | Abacavir <sup>4</sup> , Pazopenib <sup>5</sup>                                   | 2              | 2               | 0                     |
| <b>B*58:01</b> | Allopurinol <sup>6</sup>                                                         | 4              | 4               | 0                     |

HLA prediction accuracy on specific alleles that are associated with pharmacological adverse events. For reference samples known to carry these alleles, we assessed how frequently HLA prediction identified these alleles as well as the rate of false positive calls.
